# Supplementary material for: Developing ABEmax-NG with Precise Targeting and Expanded Editing Scope to Model Pathogenic Splice Site Mutations In Vivo
Source: PubMed Central journal article supplement — iScience. 2019 May 11;15:640–8. doi: 10.1016/j.isci.2019.05.008 (PMC6548941; doi:10.1016/j.isci.2019.05.008), 2019-05-11
Supplement: mmc1.pdf [file mmc1.pdf]

ISCI, Volume 15

## **Supplemental Information**

**Developing ABEmax-NG with Precise**

**Targeting and Expanded Editing Scope**

**to Model Pathogenic Splice Site Mutations *In Vivo***

**Shisheng Huang, Zhaodi Liao, Xiangyang Li, Zhen Liu, Guanglei Li, Jianan Li, Zongyang Lu, Yu Zhang, Xiajun Li, Xu Ma, Qiang Sun, and Xingxu Huang**

## Supplemental Figures and Legends

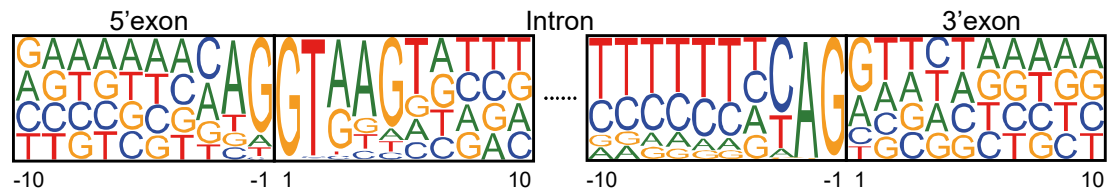

**Figure S1. Human genomic sequence features in the surrounding area of splice sites, Related to Figure 1.**

Human reference genome (hg38) and the annotation from GENCODE version 29 were used for analysis. The font size indicates the probability of bases at each position.

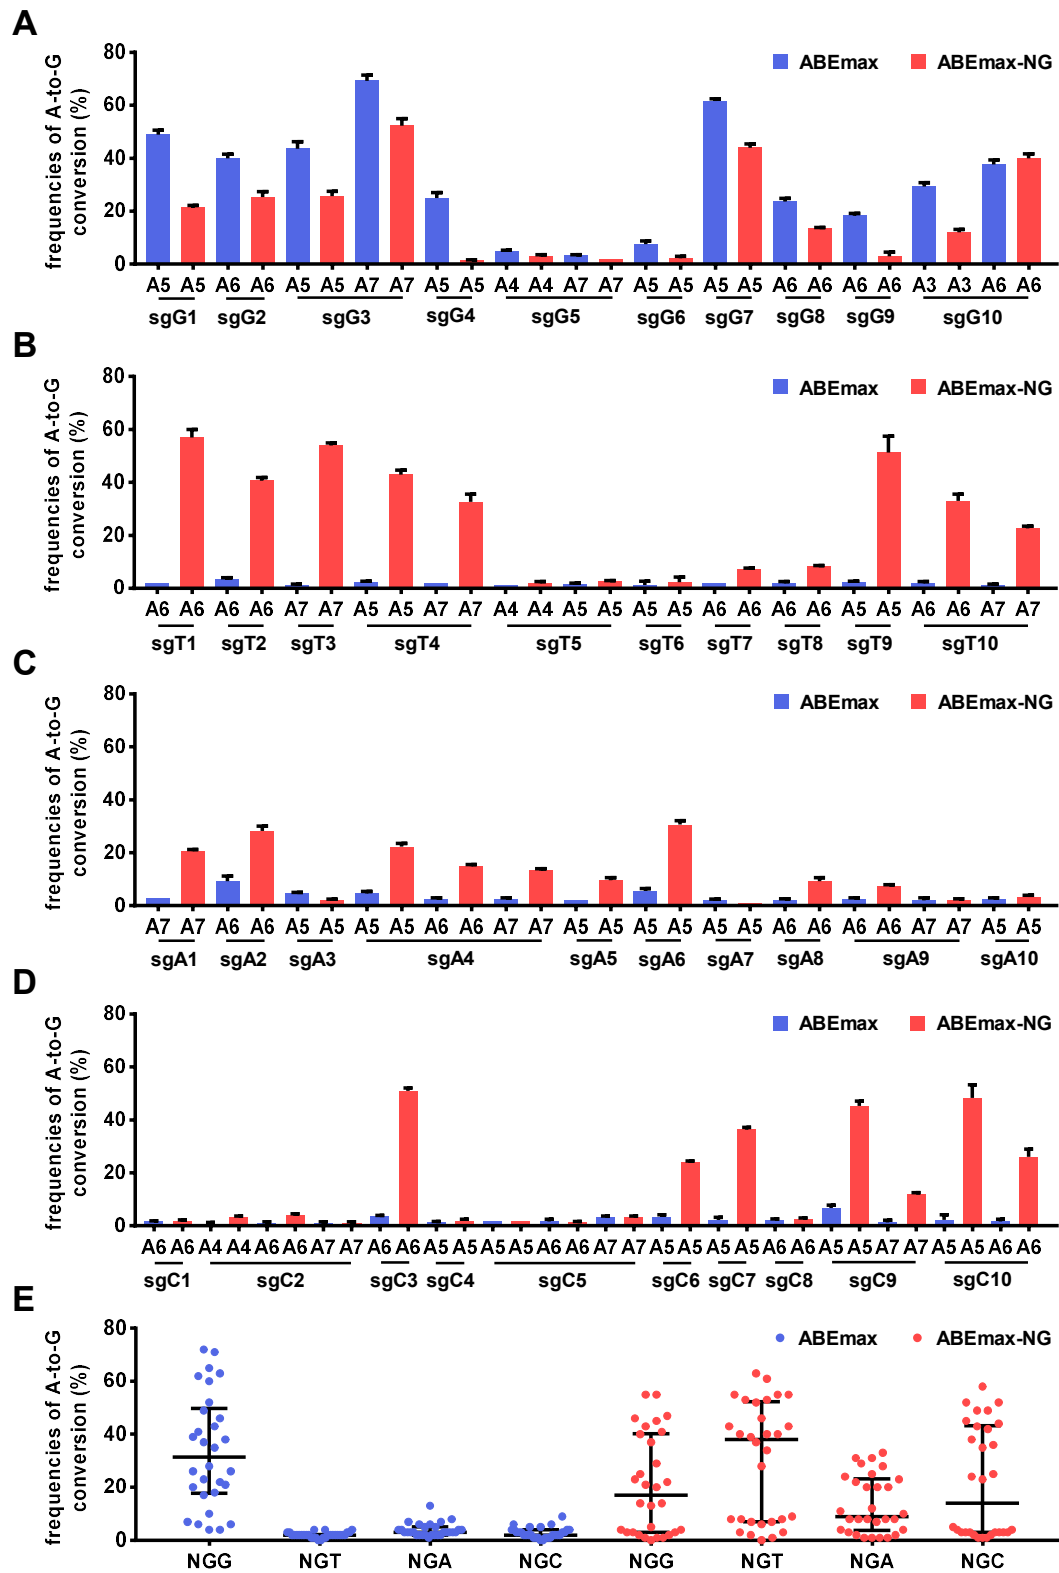

**Figure S2. Analysis of ABEmax-NG-induced A-to-G substitution in mouse N2a cells, Related to Figure 3.**

(A-D) A-to-G editing efficiency of ABEmax and ABEmax-NG at endogenous target sites with NGG PAM (A), NGT PAM (B), NGA PAM (C) and NGC PAM (D). Data are represented as the

mean  $\pm$  s.e.m. (n = 3 from three independent experiments). The editing efficiency was calculated by EditR based on Sanger sequencing chromatograms.

(E) Statistical analysis of the A-to-G editing frequency at a total of 40 endogenous target sites in A-D. The median and interquartile range (IQR) are shown.

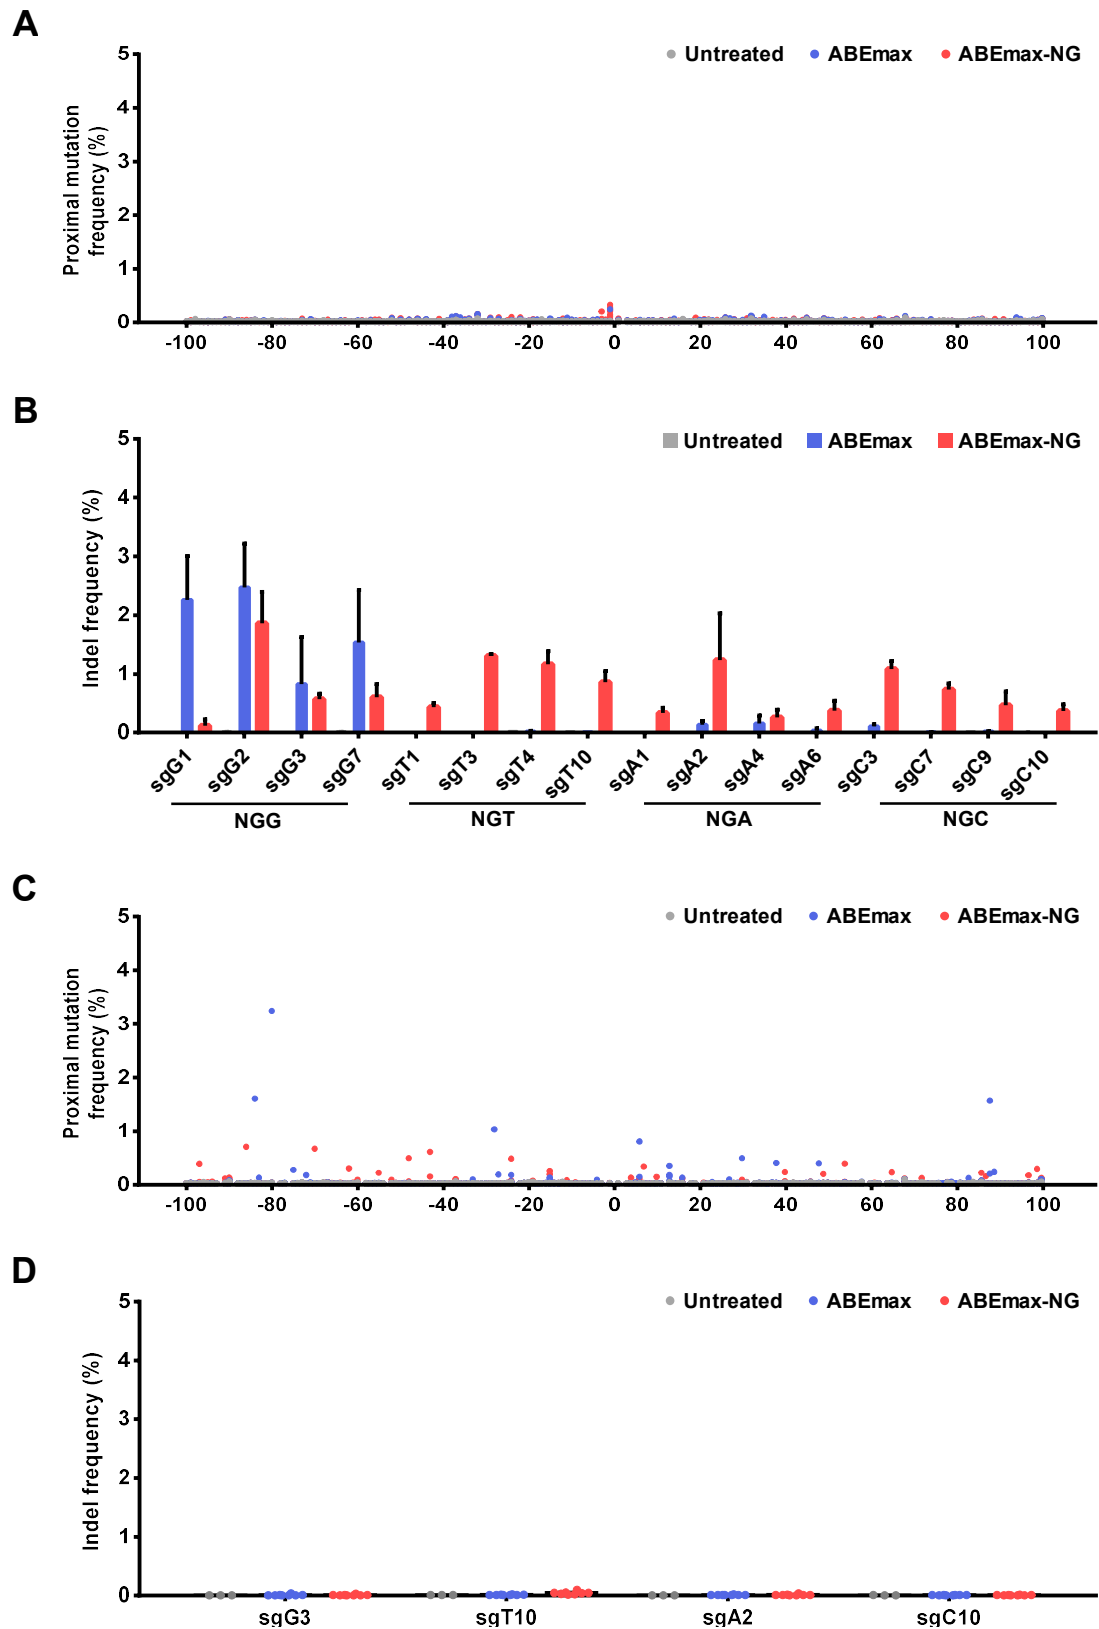

**Figure S3. Analysis of proximal off-targets and indels for ABEmax and ABEmax-NG *in vitro* and *in vivo*, Related to Figure 3.**

(A) Proximal off-targets of ABEmax and ABEmax-NG at 16 endogenous target sites in N2a cells were analyzed by deep sequencing. The mutation rates of A-to-G or T-to-C sites  $\pm 100$  bp

surrounding the protospacer were calculated, designated the side of the protospacer distal to the PAM as negative positions, while the side that includes the PAM as positive numbers, counting against their positions relative to the protospacer.

(B) Analysis of indels at 16 endogenous target sites in N2a cells by deep sequencing. Reads containing at least 1 inserted or deleted nucleotides in the protospacer were calculated as indel-containing reads. Indel frequency was calculated as the number of indel-containing reads among the total number of mapped reads.

(C) Proximal off-targets of ABEmax and ABEmax-NG at 4 endogenous target sites in mouse embryos were analyzed by deep sequencing.

(D) Analysis of indels at 4 endogenous target sites in mouse embryos by deep sequencing.

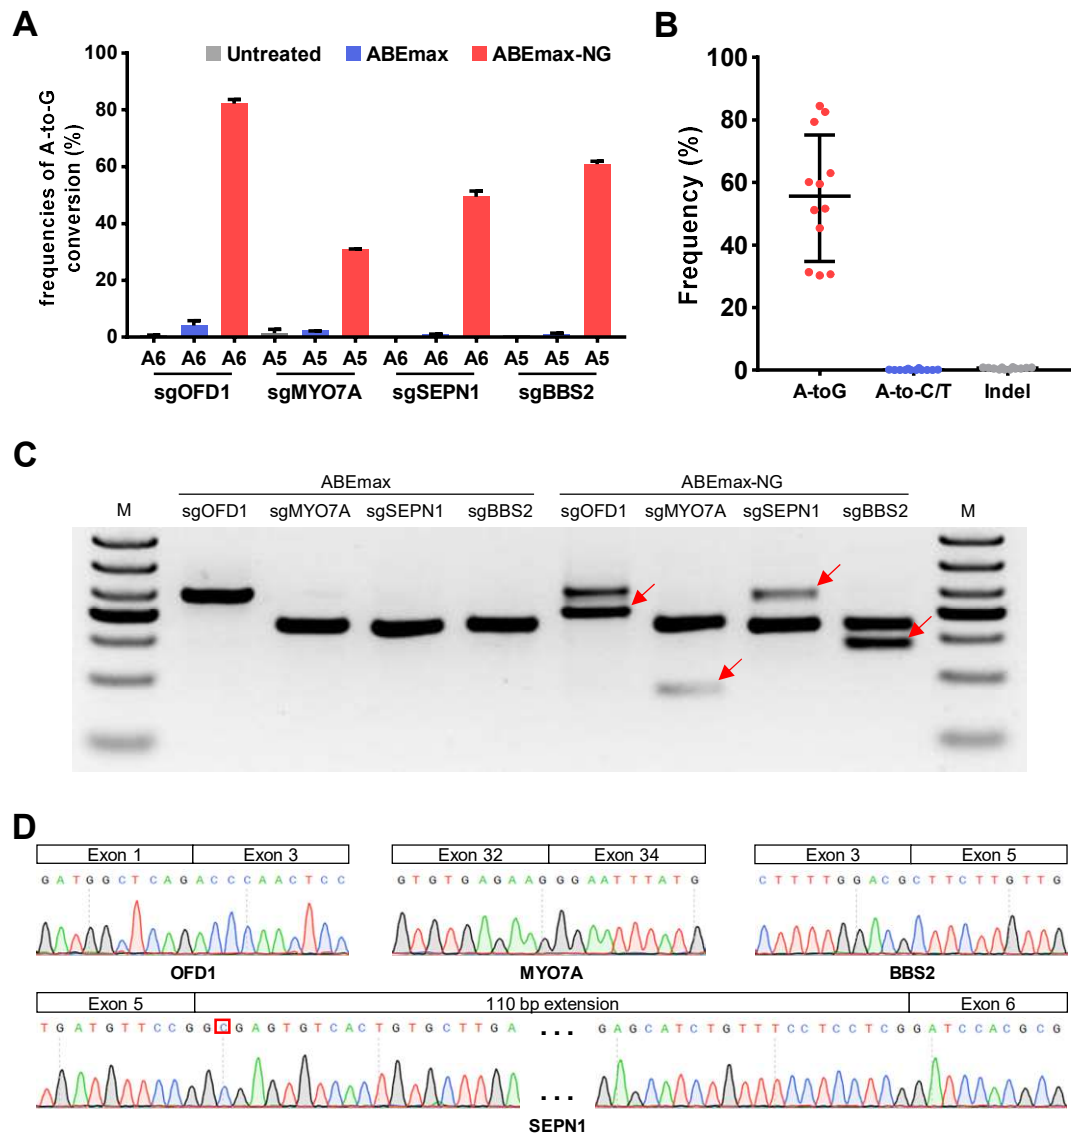

**Figure S4. ABEmax-NG modulated endogenous RNA splicing in N2a cells, Related to Figure**

**4.**

(A) A-to-G editing by ABEmax and ABEmax-NG at 4 splice sites in mouse N2a cells. Data are represented as the mean  $\pm$  s.e.m. (n = 3 from three independent experiments).

(B) Statistical analysis of the A-to-G editing frequency, unwanted base conversions and indels induced by ABEmax-NG in (A). The median and interquartile range (IQR) are shown.

(C) Different RNA isoforms induced by ABEmax-NG were determined by RT-PCR. ABEmax served as the control. New splicing isoforms were highlighted by red arrowheads.

(D) Sanger sequencing chromatograms of the RT-PCR products confirmed the new splicing isoforms. Exon 2 of OFD1, exon 33 of MYO7A and exon 4 of BBS2 skipped in new splicing isoforms. The target splice site highlighted by red frame was converted from T to C in new splicing isoform of SEPN1 harboring 110 bp extension of exon 5.

**A**

| Target gene | sgRNA   | Editor    | No. of examined embryos | Mutant ratio (%)                     |                              |                            |
|-------------|---------|-----------|-------------------------|--------------------------------------|------------------------------|----------------------------|
|             |         |           |                         | No. of targeted mutants <sup>a</sup> | No. of A-to-C/T <sup>a</sup> | No. of indels <sup>a</sup> |
| AKR1C19     | sgG3    | ABEmax    | 8                       | 8(100)                               | 0(0)                         | 0(0)                       |
| EYA1        | sgT10   | ABEmax    | 8                       | 0(0)                                 | 0(0)                         | 0(0)                       |
| SIX6        | sgA2    | ABEmax    | 8                       | 7(87)                                | 0(0)                         | 0(0)                       |
| BHLHA9      | sgC10   | ABEmax    | 8                       | 0(0)                                 | 0(0)                         | 0(0)                       |
| OFD1        | sgOFD1  | ABEmax    | 8                       | 7(87)                                | 0(0)                         | 0(0)                       |
| MYO7A       | sgMYO7A | ABEmax    | 8                       | 5(63)                                | 0(0)                         | 0(0)                       |
| SEPN1       | sgSEPN1 | ABEmax    | 8                       | 1(13)                                | 0(0)                         | 0(0)                       |
| BBS2        | sgBBS2  | ABEmax    | 8                       | 4(50)                                | 0(0)                         | 0(0)                       |
| AKR1C19     | sgG3    | ABEmax-NG | 8                       | 8(100)                               | 0(0)                         | 0(0)                       |
| EYA1        | sgT10   | ABEmax-NG | 8                       | 8(100)                               | 0(0)                         | 0(0)                       |
| SIX6        | sgA2    | ABEmax-NG | 8                       | 8(100)                               | 0(0)                         | 0(0)                       |
| BHLHA9      | sgC10   | ABEmax-NG | 8                       | 8(100)                               | 0(0)                         | 0(0)                       |
| OFD1        | sgOFD1  | ABEmax-NG | 8                       | 8(100)                               | 0(0)                         | 0(0)                       |
| MYO7A       | sgMYO7A | ABEmax-NG | 8                       | 8(100)                               | 0(0)                         | 0(0)                       |
| SEPN1       | sgSEPN1 | ABEmax-NG | 8                       | 8(100)                               | 0(0)                         | 0(0)                       |
| BBS2        | sgBBS2  | ABEmax-NG | 8                       | 8(100)                               | 0(0)                         | 1(13)                      |

<sup>a</sup>Calculated from the number of examined embryos**B**

| Target gene | sgRNA  | Editor    | No. of transferred embryos | No. of offspring | Mutant ratio (%)                     |                                               |                              |                            |
|-------------|--------|-----------|----------------------------|------------------|--------------------------------------|-----------------------------------------------|------------------------------|----------------------------|
|             |        |           |                            |                  | No. of targeted mutants <sup>a</sup> | No. of homozygous target mutants <sup>a</sup> | No. of A-to-C/T <sup>a</sup> | No. of indels <sup>a</sup> |
| BBS2        | sgBBS2 | ABEmax-NG | 40                         | 19               | 19(100)                              | 0(0)                                          | 0(0)                         | 0(0)                       |

<sup>a</sup>Calculated from the number of offspring**Figure S5. Summary of the manipulation and genotyping of mouse embryos and newborn pups, Related to Figure 4.**

(A) Summary of the manipulation and genotyping of mouse embryos.

(B) Summary of the manipulation and genotyping of newborn pups.



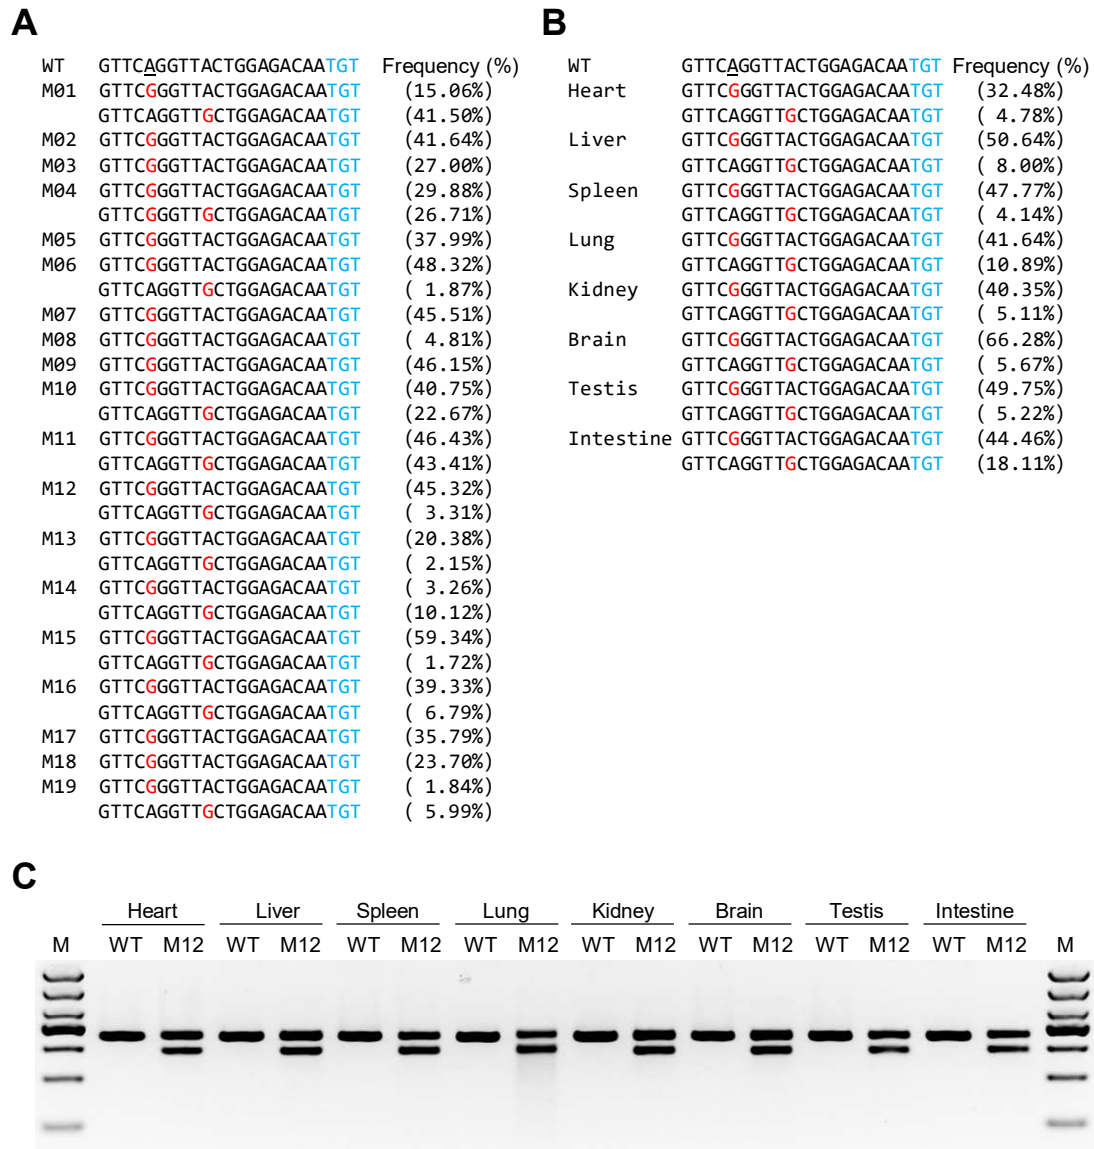

**Figure S6. Verification of genotype and RNA splicing in founder mice, Related to Figure 4.**

(A) Alignments of modified sequences from newborn pups after microinjection of ABEmax-NG mRNA and sgRNAs targeting at BBS2 splice site into one-cell embryos. The PAM sequences and substitutions are highlighted in blue and red, respectively. Frequency is calculated from deep sequencing.

(B) Alignments of modified sequences from different tissues of the founder mouse M12.

(C) Different RNA isoforms induced by ABEmax-NG were determined by RT-PCR from different tissues of founder mouse M12. Wild-type mouse served as the control.

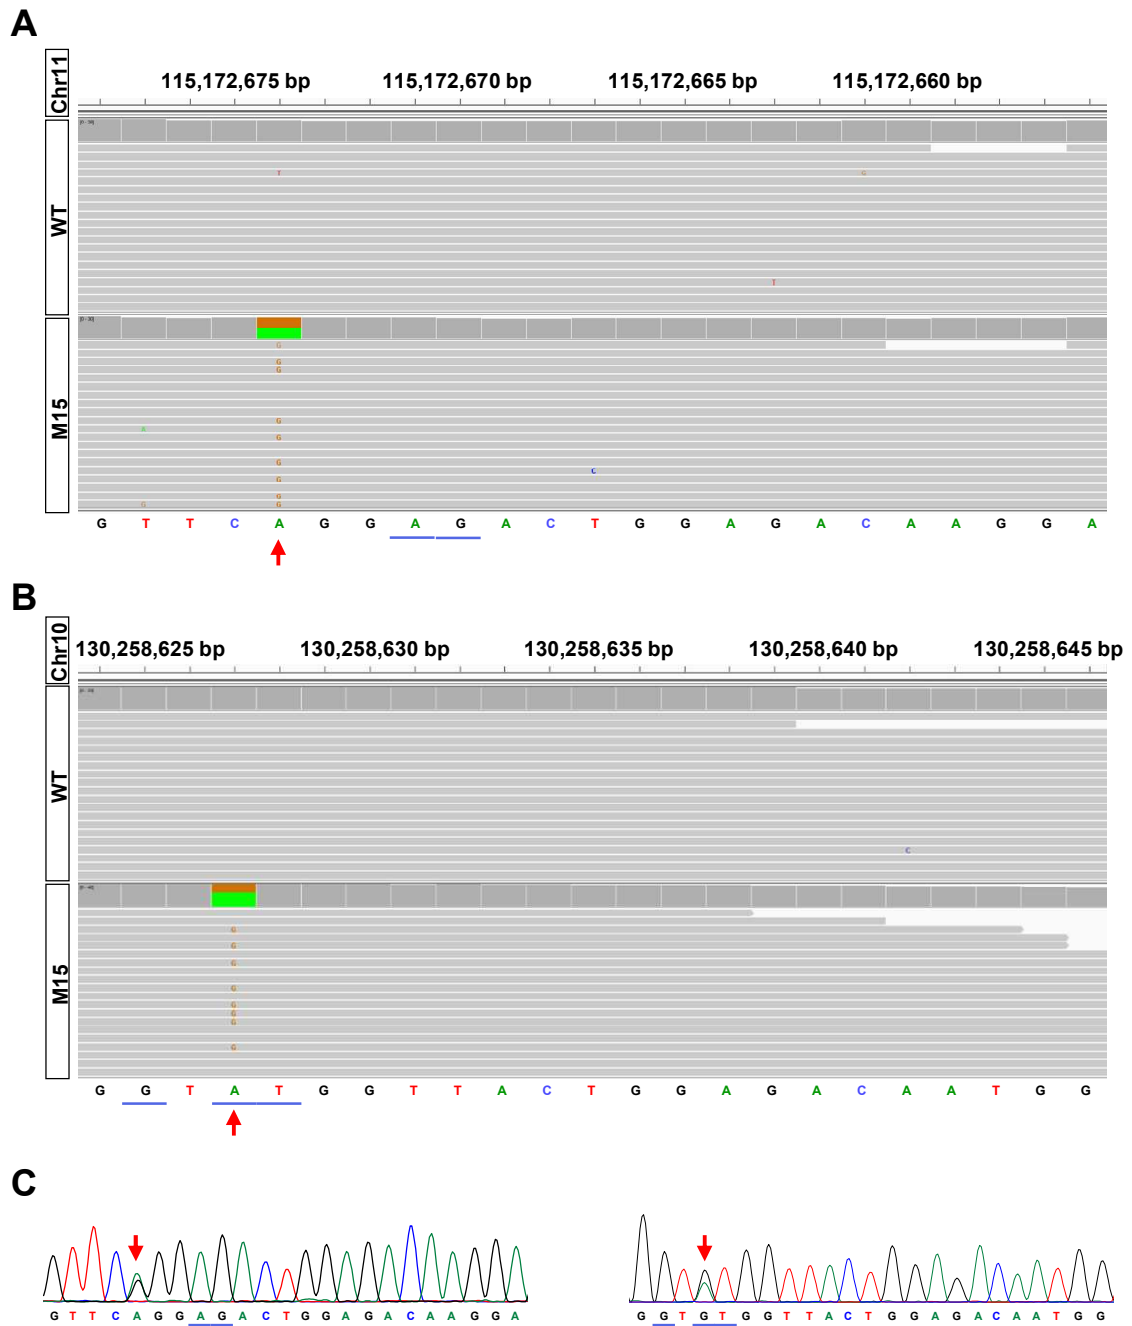

**Figure S7. Verification of off-target sites, Related to Figure 5.**

(A) Integrative Genomics Viewer (IGV) images showing the alignments of sequence reads at the off-target site NC\_000077.6: g.115172674T>C.

(B) IGV images showing the alignments of sequence reads at the off-target site NC\_000076.6: g.130258627A>G.

(C) Verification of off-target sites by Sanger sequencing chromatograms. Left: NC\_000077.6: g.115172674T>C. Right: NC\_000076.6: g.130258627A>G.

Blue lines represent the mismatches of sgRNA sequence and red arrows indicate the off-target sites.

## Supplemental Tables

**Table S1. sgRNAs used in this study, Related to Figure 2-4.**

| Site   | Protospacer sequence | PAM | Target gene | Corresponding human genotype | Associated genetic disease |
|--------|----------------------|-----|-------------|------------------------------|----------------------------|
| sgEGFP | AGCACTACACGCCGTAGGTC | AGN | sEGFP       |                              |                            |
| sgA1   | CAATCCAGACACTGGTGGTC | AGA | CHRNE       |                              |                            |
| sgA2   | CGGGCAGCGACCATAGGAAG | CGA | SIX6        |                              |                            |
| sgA3   | GAGCACTCGTCGAGGTCTGC | AGA | FBN1        |                              |                            |
| sgA4   | ATGGAAAGCAGACACGATAG | TGA | ITPR1       |                              |                            |
| sgA5   | CAAGATGTATGGCGAGTATG | TGA | FGD1        |                              |                            |
| sgA6   | GAACATGAACTCTTACGACT | CGA | TMEM67      |                              |                            |
| sgA7   | TTCTATGAGCAGAAAATTAA | AGA | RNF216      |                              |                            |
| sgA8   | ACCTCAGGTAATGTAGCATC | AGA | MLH1        |                              |                            |
| sgA9   | GGATGAAACTATAGCGGGAT | CGA | NUP205      |                              |                            |
| sgA10  | ATTCAGCTCCCGAACATCT  | CGA | TRP53       |                              |                            |
| sgC1   | CTTCCAGGGGGAGCGAGGAA | AGC | COL6A1      |                              |                            |
| sgC2   | TACACAACCTCACAGTCCTC | AGC | MKKS        |                              |                            |
| sgC3   | CCTCTATTGTGCTGTCATGT | TGC | LMBR1       |                              |                            |
| sgC4   | CGGGAGCCCCTAGGTGGCC  | AGC | MEGF8       |                              |                            |
| sgC5   | TAAGAAAGTACCAAATCGAC | AGC | MTM1        |                              |                            |
| sgC6   | TACCAGTCCCCTTCGCTCCC | TGC | CD207       |                              |                            |
| sgC7   | CAGCAGCTCGTCCTTCACTG | CGC | NFIX        |                              |                            |
| sgC8   | AGGTCAGCACTCTGACCACG | TGC | NBEAL2      |                              |                            |
| sgC9   | TATTACAGAAACCAGCCCCG | AGC | DES         |                              |                            |
| sgC10  | GGCTAACGTGCGGGAGCGCA | AGC | BHLHA9      |                              |                            |
| sgG1   | ATTGATGTAATGGATGCAGT | GGG | NDUFS1      |                              |                            |
| sgG2   | GTTTCAGAATCGAAGGGTGA | AGG | HOXD13      |                              |                            |
| sgG3   | AGACATATTCCTCACTACAA | AGG | AKR1C19     |                              |                            |
| sgG4   | CTTTAGCTTGACATGCAGCG | CGG | NIPBL       |                              |                            |
| sgG5   | CCCACCAGCTCAAATGCAAT | GGG | SLC16A2     |                              |                            |
| sgG6   | AGCCAGGTGGGCGTTCCTCT | TGG | FERMT1      |                              |                            |
| sgG7   | GCGCATGGCCACTTCCTGTG | GGG | LMNA        |                              |                            |
| sgG8   | AATTCAGTAAAGCTGGAA   | AGG | PTEN        |                              |                            |
| sgG9   | CCCTCAGGGGTACTCTGACT | CGG | ZEB2        |                              |                            |
| sgG10  | CTACTATGACCTCTATGGTG | GGG | PTPN11      |                              |                            |
| sgT1   | CTTGTATCAGGACCACATGC | AGT | WNT5A       |                              |                            |

|         |                       |     |        |                            |                                              |
|---------|-----------------------|-----|--------|----------------------------|----------------------------------------------|
| sgT2    | TCCGCAGCCGCCCCACAACC  | AGT | WNT5A  |                            |                                              |
| sgT3    | AACGTGATGGCCATGTCGCC  | TGT | SUFU   |                            |                                              |
| sgT4    | AGCCAGACTCTGCCGATGAC  | AGT | GJA8   |                            |                                              |
| sgT5    | GAAAATGTTCTTGGCTGTTT  | TGT | TYR    |                            |                                              |
| sgT6    | ATTACCCCAAGGGAGGCCG   | AGT | PLCB4  |                            |                                              |
| sgT7    | GGTTGATGAGCACACTGGCC  | AGT | AHI1   |                            |                                              |
| sgT8    | GCGGGAGCGCCAGCGCACGC  | AGT | TWIST1 |                            |                                              |
| sgT9    | CACCATGGCTCTACGGCGAC  | AGT | CKAP2L |                            |                                              |
| sgT10   | TTTGAAGGAAAGTGGTATA   | CGT | EYA1   |                            |                                              |
| sgBBS2  | G TTCAGGTTACTGGAGACAA | TGT | BBS2   | NC_000016.10:g.56510923T>C | Bardet-Biedl syndrome 2                      |
| sgOFD1  | CTGATACCTGAAGTGTGTCC  | AGT | OFD1   | NC_000023.11:g.13735348T>C | Oral-facial-digital syndrome                 |
| sgMYO7A | CCTCAGGAGGACGACCTGGC  | TGA | MYO7A  | NC_000011.10:g.77194352A>G | Deafness, autosomal recessive 2              |
| sgSEPN1 | CACTCACCGGAACATCACGG  | TGT | SEPN1  | NC_000001.11:g.25809152T>C | Eichsfeld type congenital muscular dystrophy |

**Table S2. Primers used for PCR amplification, genotyping and transcription, Related to Figure 2-4.**

| Primer name | Primer sequence       |
|-------------|-----------------------|
| sgA1_F      | AGAGCTTAGCCTGTATCACC  |
| sgA1_R      | TAGAACAATCTCTGGCAGCC  |
| sgA10_F     | CCTGTAAGTGGAGCCAGCTT  |
| sgA10_R     | AAGTCAGTTCTCGTAGGGTG  |
| sgA2_F      | GAACCCAACCCACAGCTCTT  |
| sgA2_R      | CAGCGGGAAGTTCTTCCTTA  |
| sgA3_F      | CACATTGCAGCACTAGAAGC  |
| sgA3_R      | TACCATCATAACAGCTCTGCC |
| sgA4_F      | ATGTCCTGACAGATACAGGC  |
| sgA4_R      | TGGTCTGTGCTGATAGGTCA  |
| sgA5_F      | GAGTTAGGCTAGGGTTTCAC  |
| sgA5_R      | AGCCATGAGGCAGCTTTAAC  |
| sgA6_F      | AGACACACATGCAGGCAAAG  |
| sgA6_R      | AGCCAAGGAAGGTTCTGTCT  |
| sgA7_F      | GCTTGGGTTCTAGTGAGTA   |
| sgA7_R      | GCGCATGTGGTACTAGTGAT  |
| sgA8_F      | CTTTATGGCCATGTGTGAGG  |
| sgA8_R      | GGATGCTGTTTCTTGACCCA  |
| sgA9_F      | TGGCAGTCGGATGTAAAGTG  |
| sgA9_R      | GGTGGTTCTCCTCAGTTCAT  |
| sgBBS2_F    | CCGAGGTTGCTCTTGTCTTC  |
| sgBBS2_R    | ACAGAGGCAAGGACCAGTGA  |
| sgBBS2_RT_F | TGAACCCTGAGCTTGGCTAT  |
| sgBBS2_RT_R | GTCTGCCACAATCTCATCTTC |
| sgC1_F      | AGGCACAACCTAAGCCCAA   |
| sgC1_R      | TCAGACTTGGTCAGCCTGAA  |
| sgC10_F     | TGGACCCAAATAGCTGAAGC  |
| sgC10_R     | CGGAACACTGAAGCTGGAAT  |
| sgC2_F      | CATACCTGGAGACCAGTCTT  |
| sgC2_R      | CTGAAGTCAACTGGGATTCG  |
| sgC3_F      | ATCCAGCCATCCTAGAGTGT  |
| sgC3_R      | CAATGAACGCTCATGGAGTC  |

|           |                       |
|-----------|-----------------------|
| sgC4_F    | TCAGTACGGAGGTTTCAGTGA |
| sgC4_R    | GTCATAGGAGGTGGAGACAT  |
| sgC5_F    | CACTCACCAACCAACATGGT  |
| sgC5_R    | GGGGTAGTCTCAAGTGAGAT  |
| sgC6_F    | AGATGCTGCACCTGCAAATC  |
| sgC6_R    | GCCATATAAGACACGGAGGT  |
| sgC7_F    | GGATGAGTTCCACCCGTTTA  |
| sgC7_R    | CCGTGATGGTTAGCACAAAG  |
| sgC8_F    | ATTGCCGATCCAGCAGATGC  |
| sgC8_R    | CACCCACCAAGCCTATCGAA  |
| sgC9_F    | AAGACTGGTCCCTCTCTCTA  |
| sgC9_R    | TGTTGTTGCTGTGTAGCCTC  |
| sgEGFP_F  | TCGTTGACCGAATCACCGAC  |
| sgEGFP_R  | CCTTGAAGTCGATGCCCTTC  |
| sgG1_F    | CTGGTAGTAATCCCAACACG  |
| sgG1_R    | CCATAACACCATGGGACACA  |
| sgG10_F   | GCTGTGGGTTGCCATAGTTA  |
| sgG10_R   | TGGGCTTACAATACACTGCC  |
| sgG2_F    | GATGTGGCTTAAACCAGCC   |
| sgG2_R    | CAATGCTTGCCTTTCTAGGC  |
| sgG3_F    | CCATTTATGCCACTCTCTTC  |
| sgG3_R    | TGTTTACCTGAACTCACTGC  |
| sgG4_F    | TGCAATTGCCGTTCTGAACAA |
| sgG4_R    | TGCTCTTCAAAGCATAACC   |
| sgG5_F    | GCAGATAGTAGAAACGGAGA  |
| sgG5_R    | TGCCCATGTACTCTGTTTAG  |
| sgG6_F    | AATCGTGACACCTGAGCTAG  |
| sgG6_R    | GTAAGTGACAGGGGATGTAG  |
| sgG7_F    | AGACTCCAGCTTACAGAGCA  |
| sgG7_R    | AATCCAGAACCCTGTCCACT  |
| sgG8_F    | GAAGACCATAACCCACCACA  |
| sgG8_R    | CAGGGATGAGGGATACTACTA |
| sgG9_F    | AAATGTGGCAAGCGCTTCTC  |
| sgG9_R    | TCTCTTCCTCATCCCGTATC  |
| sgMYO7A_F | CCCATGATTGCCTTGTGAAG  |

|              |                                  |
|--------------|----------------------------------|
| sgMYO7A_R    | CTGTCAGGCAGAAGACATCA             |
| sgMYO7A_RT_F | AAAGGAGGTCTTCACACCCT             |
| sgMYO7A_RT_R | GGGCATAATTGACCACATCC             |
| sgOFD1_F     | TAAGCATCTTAGGGCTCCG              |
| sgOFD1_R     | TCCTGCTCACTACATAGACG             |
| sgOFD1_RT_F  | AAAGCAGATGAGGATGGCTC             |
| sgOFD1_RT_R  | CCGCATCACAGCTCTCTTTA             |
| sgSEPN1_F    | CAGAGCTGACAAACCAGCTA             |
| sgSEPN1_R    | CATCCTGGTCACCAGCTAAT             |
| sgSEPN1_RT_F | GCTATTTGTCCAACAACCGC             |
| sgSEPN1_RT_R | CATACAGCCACTCCATGTCC             |
| sgT1_F       | TTCAAGCCCCTGAATGGCTG             |
| sgT1_R       | AGGCTGTAAAGCAGACAGCT             |
| sgT10_F      | CAGCCTACACACTGCTAATG             |
| sgT10_R      | GAGTCACCTGACAATGTCCT             |
| sgT2_F       | CCCAGCAAGATTTAGGCTTC             |
| sgT2_R       | TGCAGGTTGGGGATAAATGG             |
| sgT3_F       | GTCCCTGTTAGTGAGCAGGT             |
| sgT3_R       | TGAGGACAGCAGCACCCATA             |
| sgT4_F       | TAGTCGGCACAGATGAGGCA             |
| sgT4_R       | GACGAAGATGATCTGCAGCA             |
| sgT5_F       | ATGGGCTATGTACAAACTCC             |
| sgT5_R       | GAAGGATATCCTGGCAGGAA             |
| sgT6_F       | CCCGTGCTATCTACCTGCTT             |
| sgT6_R       | GTTATGGCTTCGTTTTGGGG             |
| sgT7_F       | CCCCAAAGTATGAGACCGAT             |
| sgT7_R       | TGGTGCATTCCCTCCATTC              |
| sgT8_F       | AGATGATGCAGGACGTGTCC             |
| sgT8_R       | CCTGGTACAGGAAGTCGATG             |
| sgT9_F       | AACTCTCCAATCGCAGAGCC             |
| sgT9_R       | ATCAGTGAACCTGCAGAGAC             |
| IVT-F        | TCTCGCGCGTTTCGGTGATGACGG         |
| IVT-R        | AAAAAAAGCACCGACTCGGTGCCACTTTTTTC |

**Table S3. Primers used for target deep sequencing, Related to Figure 2-4.**

| <b>Primer name</b> | <b>Primer sequence</b>    |
|--------------------|---------------------------|
| sgA1_HTS_F         | CTCATCTCACTGGTAAGACC      |
| sgA1_HTS_R         | ATAGTCGTGCCAGTCCTAAG      |
| sgA2_HTS_F         | GTTCCAGCTGCCCATTTTGA      |
| sgA2_HTS_R         | TGGCGTGCGATTCCCTAGTA      |
| sgA4_HTS_F         | TGAAGGTCCTCTGCAGTGCT      |
| sgA4_HTS_R         | GCTCAAAGAAGCAGGTTTCAT     |
| sgA6_HTS_F         | GCTAATGTGCGCTGCTTCCT      |
| sgA6_HTS_R         | CCAGAATGGAACAGAATGCACA    |
| sgBBS2_HTS_F       | GCCTTCCATTTTGGAGCCA       |
| sgBBS2_HTS_R       | CCACACACCTCTGTCTTCCC      |
| sgBBS2_RT_HTS_F    | TCATCGGTGGAAACTGTGCT      |
| sgBBS2_RT_HTS_R    | CCAAACCGACTGCCATACAT      |
| sgC10_HTS_F        | CTCCTGCTCGGAGGCTGGCA      |
| sgC10_HTS_R        | GGATAGAGCAGTGATGCGGTGG    |
| sgC3_HTS_F         | GAGGTTAGCTCCTGTAECTTC     |
| sgC3_HTS_R         | GCGACATAAACCAGGACAAT      |
| sgC7_HTS_F         | GGATGAGTTCCACCCGTTTA      |
| sgC7_HTS_R         | CTTCTTGCCCGTGATGGTTA      |
| sgC9_HTS_F         | GACAGTTGTCATAAGAAAGGTG    |
| sgC9_HTS_R         | CACCCAGCTGGTGAAAGACA      |
| sgG1_HTS_F         | GAGGGTTTGAGGCCAACATG      |
| sgG1_HTS_R         | CCTCATTACCTCTCCAGTTCTTGTG |
| sgG2_HTS_F         | CTTACACCAAAGTGCAGCTC      |
| sgG2_HTS_R         | TAAACTGTCTGTGGCCAACC      |
| sgG3_HTS_F         | TATCCATTAGCTCTAGAGG       |
| sgG3_HTS_R         | TGCAACTAAGAGTTCAACCT      |
| sgG7_HTS_F         | AGCATCAGAGGTTGGACAAG      |
| sgG7_HTS_R         | ATGGAGGAGCTCTTCTCCAT      |
| sgT1_HTS_F         | GCAGGTCTCTAGGTATGAAT      |
| sgT1_HTS_R         | CCTACCTATTTGCATCACCC      |
| sgT10_HTS_F        | TTCCCTGGGTTGGATAGAG       |
| sgT10_HTS_R        | GGTAAGAAACTGCCATGGGT      |
| sgT3_HTS_F         | ATGTTGCTCTTAGCCCCAG       |



|               |                      |
|---------------|----------------------|
| sgT3_HTS_R    | CTGCGTCTCACTTGTAACCA |
| sgT4_HTS_F    | GGAAAGAGATCATCTCAGAG |
| sgT4_HTS_R    | ATCGTAGCAGACATTCTCAC |
| sgT9_HTS_F    | TTCCTGTTATCCCGCCCTCT |
| sgT9_HTS_R    | TCCAGCGTCCTTAACCTAAC |
| sgOFD1_HTS_F  | CAGGTCCACGTTGACACTAG |
| sgOFD1_HTS_R  | TAAATGTGGAGCCACCTGCG |
| sgMYO7A_HTS_F | GACAGGGAGAACACAGAGTC |
| sgMYO7A_HTS_R | ATGTAAGTGGGCACGAGGCT |
| sgSEPN1_HTS_F | TCATCCATCGCCTGTTAAGC |
| sgSEPN1_HTS_R | CCTCTCACCAAATCTGTAGG |

## **Transparent Methods**

**Genome-wide analysis.** To identify editable splice sites, human reference genome (hg38) and the annotation from GENCODE version 29 were used. sgRNAs of validated CBE and ABE variants were then designed to target splice sites according to their distinct PAM specificities and corresponding editing windows. The sgRNAs with a single target site in their editing windows were considered as precise editing sgRNAs and used for further analysis. Pathogenic human splice sites were annotated by ClinVar database.

**Animals.** All the experiment protocols involving mice were approved by the Animal Care and Use Committee of the Institute of Neuroscience, Chinese Academy of Sciences, Shanghai, China. Mice were maintained in an Assessment and Accreditation of Laboratory Animal Care credited specific pathogen free facility under a 12 h dark-light cycle. B6D2F1 (C57BL/6 x DBA/2) and ICR mouse strains were used as embryo donors and foster mothers, respectively.

**Plasmid construction.** For construction of sgRNAs, oligos were synthesized, annealed and cloned into BsaI site of the sgRNA expression vector. Plasmids used include pGL3-U6-sgRNA-PGK-puromycin (Addgene, 51133), pGL3-U6-sgRNA-EGFP (Addgene, 107721), pUC57-sgRNA expression vector (Addgene, 51132), pGL3-U6-sgRNA-mCherry.

**Cell culture and transfection.** HEK293FT and Neuro-2a (N2a) cells were maintained in Dulbecco's Modified Eagle Medium (DMEM) (Hyclone), supplemented with 10% fetal bovine serum (FBS) (v/v) (Gemini) and 1% Penicillin Streptomycin (v/v) (Gibco). Cells were seeded on poly-D-lysine coated 12-well plates (JETBIOFIL) and transfected at approximately 70% confluence with ABEmax or ABEmax-NG expressing plasmid (1000 ng) and sgRNA-expressing plasmid (500 ng) using Lipofectamine 2000 (Life Technologies) according to the manufacturer's protocol. Puromycin was added 1 day post-transfection and was maintained in culture until untreated control cells were all died. For deep sequencing, GFP positive cells were harvested from fluorescence-activated cell sorting (FACS) 72 h after transfection. Cells were cultured at 37°C with 5% of CO<sub>2</sub>.

**Flow cytometry.** Cells were harvested and subjected to flow cytometry 48 hours after transfection. sgRNAs were annealed and cloned into pGL3-U6-sgRNA-mCherry. GFP signal was detected with flow cytometry. ABEmax-NG/ABEmax, sgRNA and hPGK-sEGFP/hPGK-EGFP plasmids were transfected simultaneously. At total of 10,000 cell events were collected and analyzed using FlowJo

software.

**Genomic DNA extraction and genotyping.** Genomic DNA of cells was extracted using QuickExtract™ DNA Extraction Solution (Lucigen) according to manufacturer's protocols, genomic DNA of mouse was extracted by phenol-chloroform method, and genomic DNA of zygotes was amplified according to methods described below. The isolated DNA was PCR-amplified with Phanta® Max Super-Fidelity DNA Polymerase (Vazyme). Primers used were listed in Table S2.

**Whole genome random amplification.** After developing to blastocyst stage *in vitro*, single embryo was transferred to 200 µl tube containing 5 µl of an alkaline lysis solution (200 mM KOH/50 mM dithiothreitol). After an incubation of 10 min at 65°C, 5 µl of neutralization solution (900 mM Tris-HCl, pH 8.3/300 mM KCl/200 mM HCl) was added. The lysed and neutralized sample was added with 5 µl of a 400 µM solution of random primers (Genscript, Nanjing, China), 6 µl of 10 x PCR buffer (Takara, Dalian, China), 3 µl of a mixture of the 4 dNTPs (each at 2.5 mM), and 1 µl of Taq polymerase (Takara, Dalian, China), and brought to 60 µl with water. Fifty primer-extension cycles were carried out in a MyCycler thermo-cycler (Bio-Rad, US). Each cycle consisted of a 1 min denaturation step at 92°C, a 2 min annealing step at 37°C, a programmed ramping step of 10 sec/degree to 55°C, and a 4 min incubation at 55°C for polymerase extension. Then the products were used as the PCR templates.

***In vitro* transcription.** In brief, ABEmax/ABEmax-NG vector was linearized by BbsI enzyme (NEB) and *in vitro* transcribed using T7 Ultra Kit (Ambion) according to the manufacturer's protocols. mRNA was purified by Mini Kit (Qiagen). sgRNA oligos were annealed into pUC57-sgRNA expression vectors with T7 promoter. Then sgRNAs were amplified and transcribed *in vitro* by MEGAshortscript Kit (Ambion). The sgRNAs were purified by MEGAclear Kit (Ambion) according to the manufacturer's protocols. Primers used for transcription *in vitro* were listed in Table S2.

**Microinjection of mouse zygotes and embryo transfer.** B6D2F1 female mice at 4 weeks of age were superovulated and mated with B6D2F1 male mice. Fertilized one-cell embryos were collected from the oviducts. For microinjection, mRNA mixtures containing sgRNA (50 ng/µl) and ABEmax-NG/ABEmax (100 ng/µl) were injected into the cytoplasm of zygotes in a droplet of M2 medium containing 5 µg/ml cytochalasin B (CB) using a piezo (Primetech) microinjector. The injected

zygotes were cultured in KSOM mediums at 37°C under 5% of CO<sub>2</sub> in air and transferred to oviducts of pseudopregnant females at 0.5 dpc.

**RNA analysis.** RNA was immediately extracted from cultured cells or mouse tissues by using TRIzol reagent (Invitrogen), according to the manufacturer's instructions. Complementary DNA (cDNA) was generated using the HiScript II Q RT SuperMix (Vazyme), and was PCR-amplified with Phanta<sup>®</sup> Max Super-Fidelity DNA Polymerase (Vazyme). The PCR-amplified fragments were separated by agarose gel electrophoresis. Products with abnormally size were purified from the gel and sequenced using the amplification primers.

**Targeted deep sequencing.** Target sites were amplified from extracted genomic DNA using Phanta<sup>®</sup> Max Super-Fidelity DNA Polymerase (Vazyme). PCR products with different barcodes were pooled together for deep sequencing on Illumina HiSeq X Ten (2 × 150 PE) at the Novogene Bioinformatics Institute, Beijing, China. Primers used for deep sequencing were listed in Table S3. The adapter pair of the pair-end reads were removed using AdapterRemoval version 2.2.2, and pair-end read alignments of 11 bp or more bases were combined into a single consensus read. All processed reads were then mapped to the target sequences using the BWA-MEM algorithm (BWA v0.7.16). For each site, the mutation rate was calculated using bam-readcount with parameters -q 20 -b 30. Indels were calculated based on reads containing at least 1 inserted or deleted nucleotide in protospacer. Indel frequency was calculated as the number of indel-containing reads/total mapped reads.

**Whole genome sequencing.** Whole genome sequencing of mouse genomic DNA extracted from the tail was sequenced using an Illumina HiSeq X Ten (2 × 150 PE) at the Novogene Bioinformatics Institute, Beijing, China. The WT control mouse has the same genetic background with the Founder mouse and from our previous study (SRR8263608). All cleaned reads were mapped to the mouse reference genome (GRCm38/mm10) using BWA v0.7.16 with default parameters. Sequence reads were removed for duplicates using Sambamba v0.6.7 and realigned using Genome Analysis Toolkit (GATK v3.7) IndelRealigner. Variants were identified by GATK HaplotypeCaller and the following criteria were applied to all SNPs: (1) sequencing depth (for each individual) > 1/3× and < 3×; (2) variant confidence/quality by depth > 2; (3) RMS mapping quality (MQ) > 40.0; (4) Phred-scaled P value using Fisher's exact test to detect strand bias < 60; (5) Z-score from the Wilcoxon rank sum test of Alt vs. Ref read MQs (MQRankSum) > -12.5; and (6) Z-score from the Wilcoxon rank sum

test of Alt vs. Ref read position bias ( $\text{ReadPosRankSum} > -8$ ). After filtering out variants in the SNP database (dbSNP) and also found in the wild-type genome, potential off-target sites were predicted by CasOT-1.0 considering up to 2-bp mismatch in seed region and 5-bp mismatch in non-seed region with NG PAM.

**Data and Software Availability.** High-throughput sequencing data will be deposited in the NCBI Sequence Read Archive database under accession code (PRJNA527206). All other data are available upon reasonable request.
